# Supplementary material for: Association between Downstream Taste Signaling Genes, Oral Microbiome, and Severe Early Childhood Caries
Source: MDPI journal article supplement (doi:10.3390/ijms24010081), 2022-12-21
Supplement: s1 [file s1]

**Association among downstream taste signaling genes, oral microbiome, and severe early childhood caries**

**Vivianne Cruz de Jesus<sup>1,2</sup>, Betty-Anne Mittermuller<sup>1,2,3</sup>,**

**Pingzhao Hu<sup>2,4,5</sup>, Robert J. Schroth<sup>1,2,3,6</sup>, Prashen Chelikani<sup>1,2,4,7\*</sup>**

<sup>1</sup> Manitoba Chemosensory Biology Research Group, Department of Oral Biology, University of Manitoba, Winnipeg, MB, Canada.

<sup>2</sup> Children's Hospital Research Institute of Manitoba (CHRIM), Winnipeg, MB, Canada.

<sup>3</sup> Department of Preventive Dental Science, University of Manitoba, Winnipeg, MB, Canada.

<sup>4</sup> Department of Biochemistry and Medical Genetics, University of Manitoba, Winnipeg, MB, Canada.

<sup>5</sup> Department of Biochemistry, Western University, London, ON, Canada.

<sup>6</sup> Department of Pediatrics and Child Health, University of Manitoba, Winnipeg, MB, Canada

<sup>7</sup> Department of Physiology and Pathophysiology, University of Manitoba, Winnipeg, MB, Canada.

**Table S1.** List of primers used.

| Gene     | Forward                  | Reverse                     | Amplicon length |
|----------|--------------------------|-----------------------------|-----------------|
| GNAI2_1  | AATCAAACCTCAGCAAGTCATCCG | CTCTTGCAACTAGCCCTCTGTG      | 341             |
| GNAI2_2  | CGCAGTCGCTCGGAACT        | GTCAAAGTCCTTGTCTGGGGATT     | 318             |
| GNAI2_3  | GGAACCACCACAGCTCTGAAT    | CCTTTCCTGCCCTTTCTCTGG       | 316             |
| GNAI2_4  | CCATGTCCAGAAAGCTGAAGTGT  | GGCCACAGTGGTCAAGGTAA        | 346             |
| GNAI2_5  | GCTGGTGGGAAGGTTAGTTCTG   | GACCTGCTTCAGAGAAGGGAAAA     | 336             |
| GNAI2_6  | TTCTGAGAAGCAGAAGGACCC    | GAAACCTTTTGGGAGGTGGGAGA     | 329             |
| GNAI2_7  | GGTACATTCTTCAACTGCCTGA   | AGGCCTTGGTTAACAGTCATCG      | 340             |
| GNAI2_8  | CAGGGTCCAGCTAAGGAAGC     | GTTCACTAGGTGGTGAGGATGTG     | 340             |
| GNAI2_9  | ACCTGAGAAATGGGGTAGAAAGC  | GTGAACCACTTGTGTTGCAGAT      | 342             |
| GNAI2_10 | CTATGACTTGGTGCTAGCTGAGG  | CTACTTGGGACAAGAAGCAACCC     | 326             |
| GNAI2_11 | CCTTGCTGCACACGTAGGAT     | CTTAGTTCTTCCCCAGCACCC       | 329             |
| GNAQ_1   | CAGAGTCCAGGACGGCAATAAAT  | AAAGTGTCCCTCTTGTCTCTTGG     | 342             |
| GNAQ_2   | TGGGGTTTGGAGACAAAACCTAT  | CCAACACAGGGCTACAAAACTG      | 342             |
| GNAQ_3   | ACTCCATTCCCCACACCCTA     | ATTTTCCCTAAGTTTGTAAAGTAGTGC | 308             |
| GNAQ_4   | GTAATCAAGGCATAAAAGCTGGG  | TTTCCACAGACTCCTCTACCACT     | 326             |
| GNAQ_5   | CCTCCACATGGAAGTAAAGAGAA  | AGACCAGTATATGAAGGAAGGTGTT   | 322             |
| GNAQ_6   | TATTTCCAAACCCCCCTATGCAC  | TGTGGTCTGATGAGCTGCTATTG     | 334             |
| GNAQ_7   | CAAGGATGGTGGGCTGGG       | TGTGTGCGCGCTGTGAG           | 250             |
| GNAS_1   | CTGCAGAGCCAGAGGG         | AGGGACAGCTCAAGGTCT          | 337             |
| GNAS_2   | TCCGGCGCCAGGTAT          | TCTGGGGCTCCTGAGTG           | 349             |
| GNAS_3   | GCCCAAGCACTCCACCTTC      | GTGGGCAACTAACCTGAATCCAT     | 347             |
| GNAS_4   | CGAAGAGATGGAGACCGAAC     | TTCTGGTGGAGGGCTGTAT         | 340             |
| GNAS_5   | AGCCTGGATTCCCCAGT        | CCCCAAATCCTTCTCCATCAAG      | 345             |
| GNAS_6   | TCCCAGACCTTGCTCCA        | CCCGTGAAGTTAGAAGGAGG        | 349             |
| GNAS_7   | GCCTCCCCTCTGGGTC         | GAGAGGGTACTTTTCTCCCT        | 311             |
| GNAS_8   | GAAGCAGCAGAGATGGAAGGAG   | GCATCTGGATCGGCTGGG          | 332             |
| GNAS_9   | ATTCGCAGCCGATCCC         | GATGGATCTTGCGTCTGG          | 311             |
| GNAS_10  | CAGGGGCTCCCACTGC         | ATCCGGAGGTCCCATCG           | 282             |
| GNAS_11  | GGCCAGACGCAAGATCCAT      | GGGACTCTCAGATCGACCGAA       | 316             |
| GNAS_12  | CAACTTACTCCGAACTTTCTC    | CCCCTAGCCCCACCAG            | 339             |
| GNAS_13  | TCCTTGCCGAGGAGCC         | CGTGGCCCGGTAGACCT           | 251             |
| GNAS_14  | GTGTTTGGTTTTTGCATGTTGCT  | AGAGCCCTTCCCAGGATTTTCTA     | 341             |
| GNAS_15  | CAGAAAGGCGACCTAAGAATTGC  | TGTATGCCAATATGGCTGATGGT     | 340             |
| GNAS_16  | GTGGTGGAGTGGCTATTTCTCAT  | TCATCGTTTAAGGTCAGGTAGCA     | 328             |

|           |                            |                           |     |
|-----------|----------------------------|---------------------------|-----|
| GNAS_17   | CTCCTAACTGACATGGTGCAATA    | GGGGCTAAGGCCACACAAG       | 350 |
| GNAS_18   | CAAGTGTCTGGTCACATAGGGAAC   | TAGAACTTTCTGCCAGTGGGGTA   | 348 |
| GNAS_19   | CAAATTGATGTGAGCGCTGTGAA    | ACAGTTGGCTTACTGGAAGTTGA   | 327 |
| GNAS_20   | TGGCTTTGGTGAGATCCATTGAC    | CCCTAACACACAGAAGCAAAGC    | 327 |
| GNAS_21   | CTCTGGAATAACCAGCTGTCCTC    | TGGGCGGTCACTCCAC          | 338 |
| GNAS_22   | AACAACAGGTTTGTGGAGTGACC    | AAAAGAACCACCGCAATGAACAG   | 334 |
| GNAS_23   | GAGAAGCAAGAAAAACGCACTCC    | ACACTGGATGTGCGTGAATAAA    | 339 |
| GNAS_24   | TATGACATCAGAGGCTGGCTGAC    | CCTATGGTGGGTGATTAAGTCT    | 346 |
| GNASE01_1 | CAGCGCAACGAGGAGAAG         | AGACAGAGCCCGCGAAC         | 100 |
| GNAT3_1   | ACTAAACACGTCATACAGCACCT    | GCAGGAACTACATCAAGAACCAG   | 250 |
| GNAT3_2   | TGATTAGAAAAGCCACAGTCTT     | TGACCGTTGCCTTTATGATTTTGC  | 327 |
| GNAT3_3   | CCAGTTTGGATCATAAAGATAACTCA | AATCCTACCCATTCTCATTCTG    | 324 |
| GNAT3_4   | TGTTGAGCATCATGAACAAGGAT    | CCTCAATGCACATTTTGGAGGAT   | 328 |
| GNAT3_5   | GGCTAGAGCTTTTCTCCATGAGG    | CCTGGTTTCTCAAACGCAAAGT    | 348 |
| GNAT3_6   | AATCTCATTATGTCACCTGTTC     | CTTTATGCAATGGCAAATACCCT   | 322 |
| GNAT3_7   | GCTGCTGAGTCATTGAGCTGATA    | GGCATCATCCAGCCATGAAAAAC   | 336 |
| GNAT3_8   | TTATGGCTCAAACTCTATTGCAG    | TGTATGGTCAAAATTCCTTTTAATG | 321 |
| GNAT3_9   | TTGCACAGGAACTATGACCACTC    | CCAGACTTCACCACTATGCAGTT   | 346 |
| GNAT3_10  | TCAGGTTTTTGAAAGCAAAAGGGA   | GCTAGGTACTTCAGCAGAGCATT   | 263 |
| PLCB2_1   | GGGCTGAACCTCCTTGCTAAAT     | TCCGAACATGGATATTGGGCATC   | 349 |
| PLCB2_2   | GACCCACAGTGAAGGATGATG      | TGTCTGTGTTGCCTGATTCTCT    | 255 |
| PLCB2_3   | CATCTCCTAAGGGCAAAGTCAGG    | CCTGCCCTATGTTGGATTCTCA    | 315 |
| PLCB2_4   | CTTCCACCTGAAGTGGGGTC       | CTTCTCGCCAAGCTTACTTCCTC   | 347 |
| PLCB2_5   | CCAACTCTCGCAGCTCCTTC       | GGTGTGGAGGAGGCGAAC        | 324 |
| PLCB2_6   | TTTAAAGGGAAGTGCCTGTGGG     | GAAGTCTGTGAAGCTCAAGGAGG   | 329 |
| PLCB2_7   | CTTCTGTGTAGGGAGAGCAGGT     | GTTGGGGTGGGATCCAGATG      | 344 |
| PLCB2_8   | CTGGAAGTCTCCCTGTCTT        | CTTGGGTCCTAGGCTGTGTG      | 315 |
| PLCB2_9   | ACTGTTCTGCCCTACTCCTTACA    | ACCATGTTCTCACACTGATGCTG   | 335 |
| PLCB2_10  | GAGCTGCCTTGTCTTACTTCTCT    | AGAACGAATGCTTCAGCTCTAGG   | 348 |
| PLCB2_11  | TTTCCAGGATATCAGGGGAGGG     | AATGGAGGAAATGGAGACTGGG    | 335 |
| PLCB2_12  | TGCATTCTACCCCCAAATTCTCA    | GTTAGGTTCTCTGGTGCAGATG    | 337 |
| PLCB2_13  | CTTGTTGTAGCTGTCCCTGAGTT    | GAGGCATCTCTATAGGCCAGAGG   | 339 |
| PLCB2_14  | CTGACTCCGTGGCTGGATATTTA    | TAAGAAGATGCAGTCGGATGAGG   | 349 |
| PLCB2_15  | AGAAGAGGGGAGGGCAAAGAA      | GGTGAGTCGGGGAGGACTAT      | 348 |
| PLCB2_16  | ACATACAGCTCTGTGCGCACT      | CTGGTAATAAGGAGCTCAGGCTAT  | 339 |
| PLCB2_17  | CAAGTGAACCCTAGCATCCTCTG    | ATCACCTAAGGCCTCATGTTCT    | 342 |
| PLCB2_18  | GAACATGAGGCCTAGGGTGATT     | TGTGTGATTGAAACTAGGCAGGG   | 325 |

|            |                           |                          |     |
|------------|---------------------------|--------------------------|-----|
| PLCB2_19   | CTCTAGCTTCAGCCCTCCAAC     | GCCCTGAGAATAACACAGACCAT  | 347 |
| PLCB2_20   | GGAACCCCTGTGAAAGCAGAG     | CTCATCGACAAGTATGAGCCCAG  | 327 |
| PLCB2_21   | AGAAACCAGACCATGCCTTCAG    | GGATATGGACCTGTGCTCTTCTC  | 325 |
| PLCB2_22   | GTAGGGTTTGGCCTTAGCAT      | GCAGGGGCAATAAGGTTACTAT   | 316 |
| PLCB2_23   | GGGGTGACCCTGCTTACAAC      | TGTGGTTGATGGACTGTGTTCAAG | 297 |
| PLCB2_24   | CATTCCTGGCCAAGTTGCTTTCT   | CCTTGACGGGCTGCTTTCT      | 332 |
| PLCB2_25   | TGAGAAAGAAAGGCTTTGGGGAG   | CCTGGACTTCCTGAGAGACACA   | 347 |
| PLCB2_26   | GATGTTTGACTAGGGCCAGTACG   | TCCATCCTAACCATAACCACCAC  | 328 |
| PLCB2_27   | TCAGAAGTCAGGCTTCCCAC      | CCATAGGAAGGGGAAGTTGGGTC  | 343 |
| PLCB2_28   | TGTCTGGCCTCAATGATAAGCAG   | GAAATGGCATCCCCAATCCTCT   | 318 |
| PLCB2_29   | CATAAACCAATCCTCCCACCCAA   | AGAGCAACTAGATTTCTGGAGCA  | 315 |
| PLCB2E26_1 | GGAGCTAAAGGGCGTGGT        | GGGGACAGGCCCTGAGA        | 100 |
| PLCB2E27_1 | CAGGATCTCAGGGCCTGTC       | GAGTCGGTGAGGGGGTTG       | 100 |
| RAC1_1     | AGGGTACCAATGTGTATGTGGTG   | ACAGCAAAACAAATGGTCAAAGA  | 318 |
| RAC1_2     | TCTTGGCACACCTTCTCTAGGAT   | TTTACATGGAACCAATCCCACCC  | 350 |
| RAC1_3     | TTGTATGCTTTTGGATCTCTCCG   | TTTCATCAAGCAAAACCCCAACC  | 330 |
| RAC1_4     | GTCCAACAAGTCCTTCCCA       | AACTAAAAATTCCTAGGCTAAGTG | 253 |
| RAC1_5     | GGACATCTGTAAAGGAGCGTGTC   | TGGTTCCCCAAGAGTACACCAG   | 337 |
| RAC1_6     | GTGGTGTGATCAGAAGAGAGTG    | TCTGTAACAAAAAGTTGGCATTGA | 328 |
| RAC1E01_1  | TGCAGTTTTCTCAGCTTTG       | ACCGCCTACGCGAGACC        | 100 |
| RALB_1     | TAGGTTGAAAGCAAATCGCCTCT   | AGCTATTCAGAAGCCACCTCAAC  | 347 |
| RALB_2     | AGTGCCCATATGTGGAATTTGTG   | GAAAAGGCCAAAAAGCTTCTGGG  | 345 |
| RALB_3     | TCACAAAACCAGGGTTCGTTCTT   | GTTCCCTAAAACCCAGCAGATGA  | 326 |
| RALB_4     | TCACAGTGTGAGGTTAACAAAAGAA | TTTGAGTGAATGAAGTCGGGGAG  | 325 |
